# Supplementary material for: Probing the mechanisms and dynamics of gas phase hydrogen–deuterium exchange reactions of sodiated polyglycines
Source: Royal Society of Chemistry journal article supplement (doi:10.1039/c4cp03960b), 2015-01-01
Supplement: c4cp03960b1.pdf [file c4cp03960b1.pdf]

### Supplementary Information

- Figure S1.** Variation of  $\text{Log}_{10}$ (relative ion intensities) hydrogen-deuterium exchange of sodiated trialanine as a function of reaction times with  $\text{ND}_3$  at a pressure of  $2.8 \times 10^{-8}$  mbar.
- Figure S2.** Variation of relative ion intensities for the first hydrogen-deuterium exchange of sodiated diglycine and sodiated dialanine as a function of reaction times with  $\text{ND}_3$  at a pressure of  $2.8 \times 10^{-8}$  mbar.
- Figure S3.** Variation of relative ion intensities for sodiated trialanine as a function of reaction times with  $\text{ND}_3$  at a pressure of  $4.1 \times 10^{-8}$  mbar.
- Figure S4.** Variation of relative ion intensities for sodiated tetraglycine as a function of reaction times with  $\text{ND}_3$  at a pressure of  $1.6 \times 10^{-8}$  mbar.
- Figure S5.** Variation of relative ion intensities for sodiated pentaglycine as a function of reaction times with  $\text{ND}_3$  at a pressure of  $1.1 \times 10^{-8}$  mbar.
- Figure S6.** Variation of relative ion intensities for sodiated octaglycine as a function of reaction times with  $\text{ND}_3$  at a pressure of  $2.0 \times 10^{-8}$  mbar.

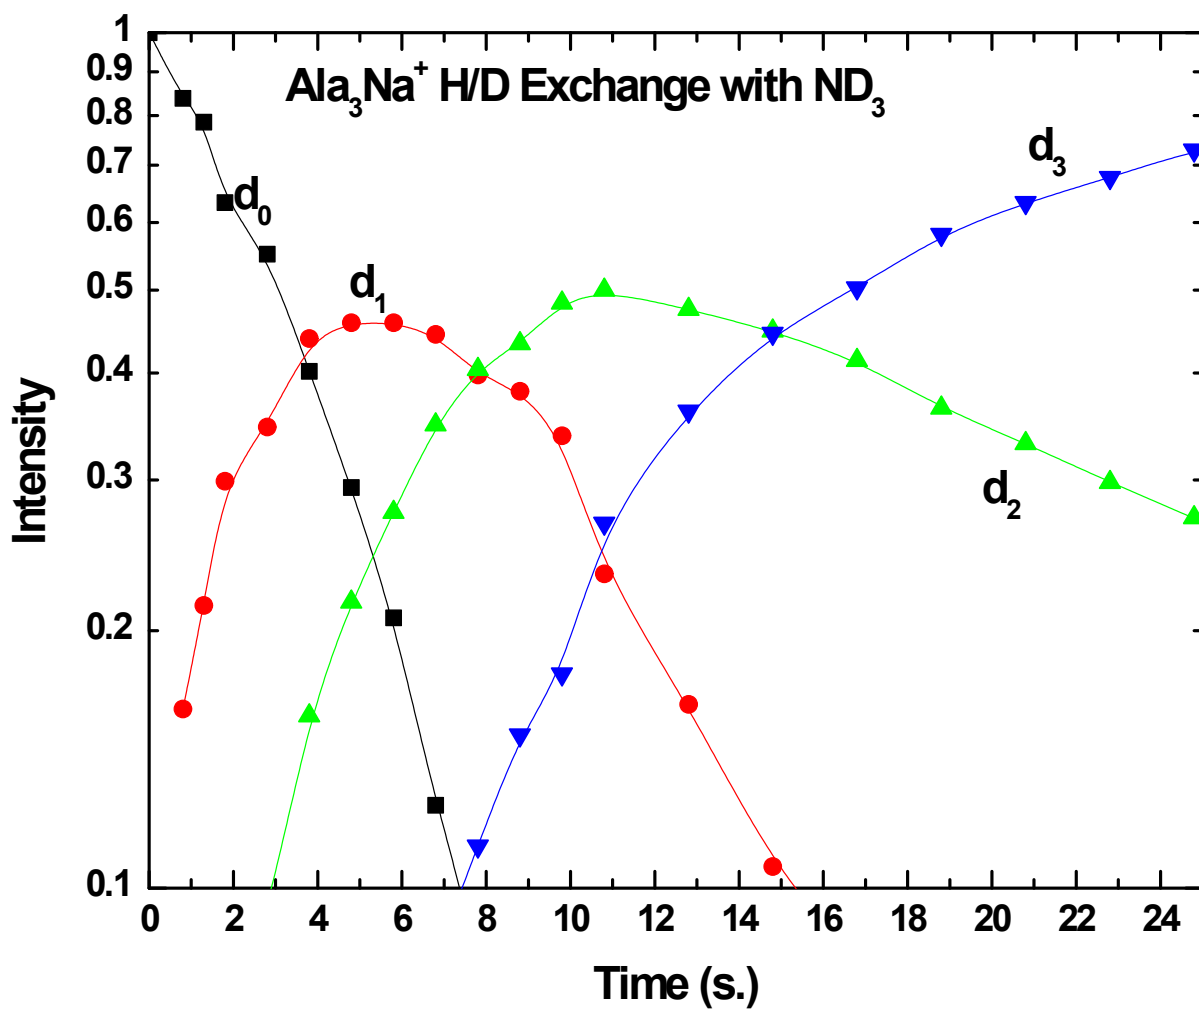

Figure S1

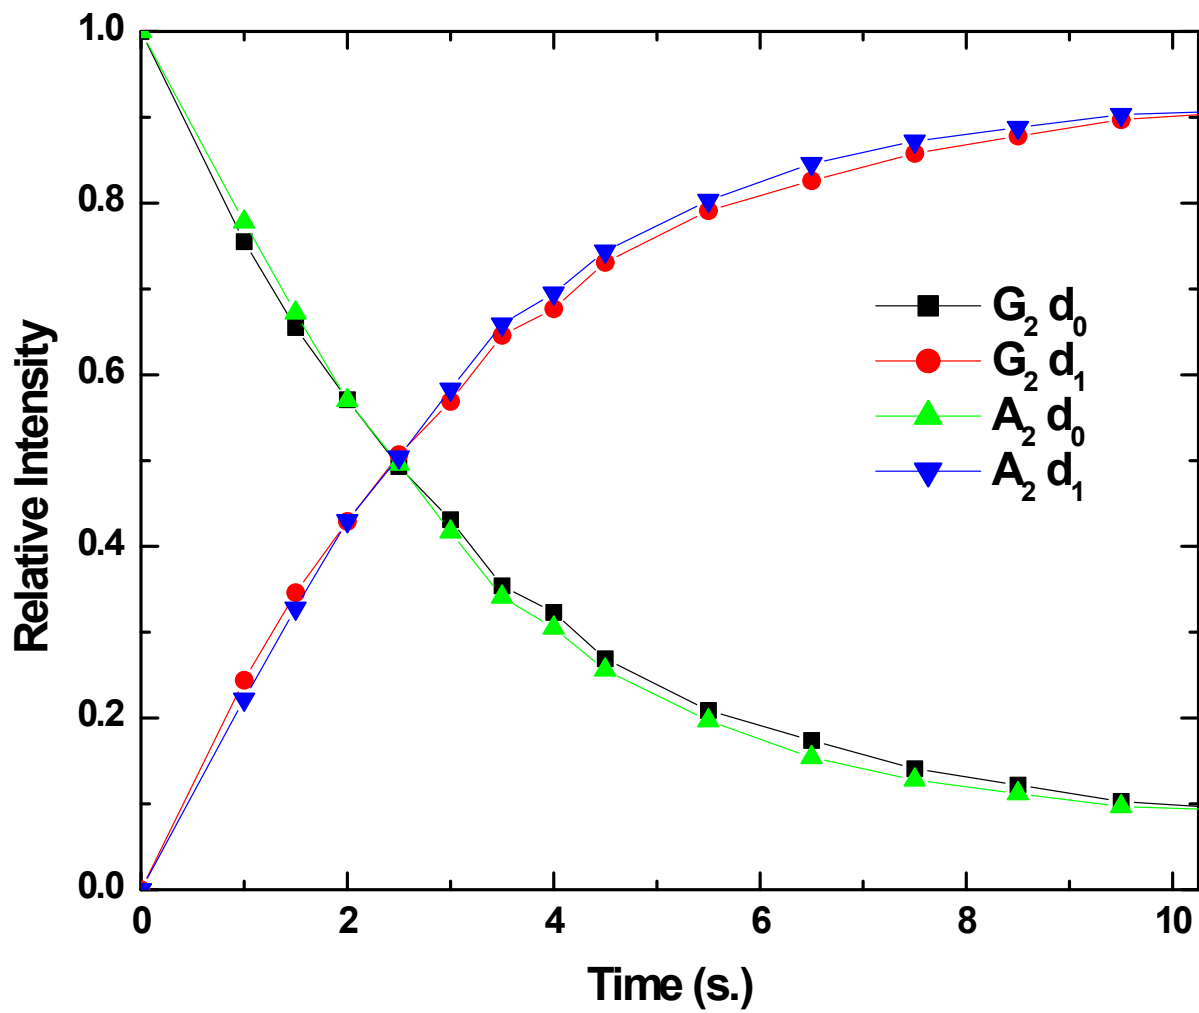

Figure S2

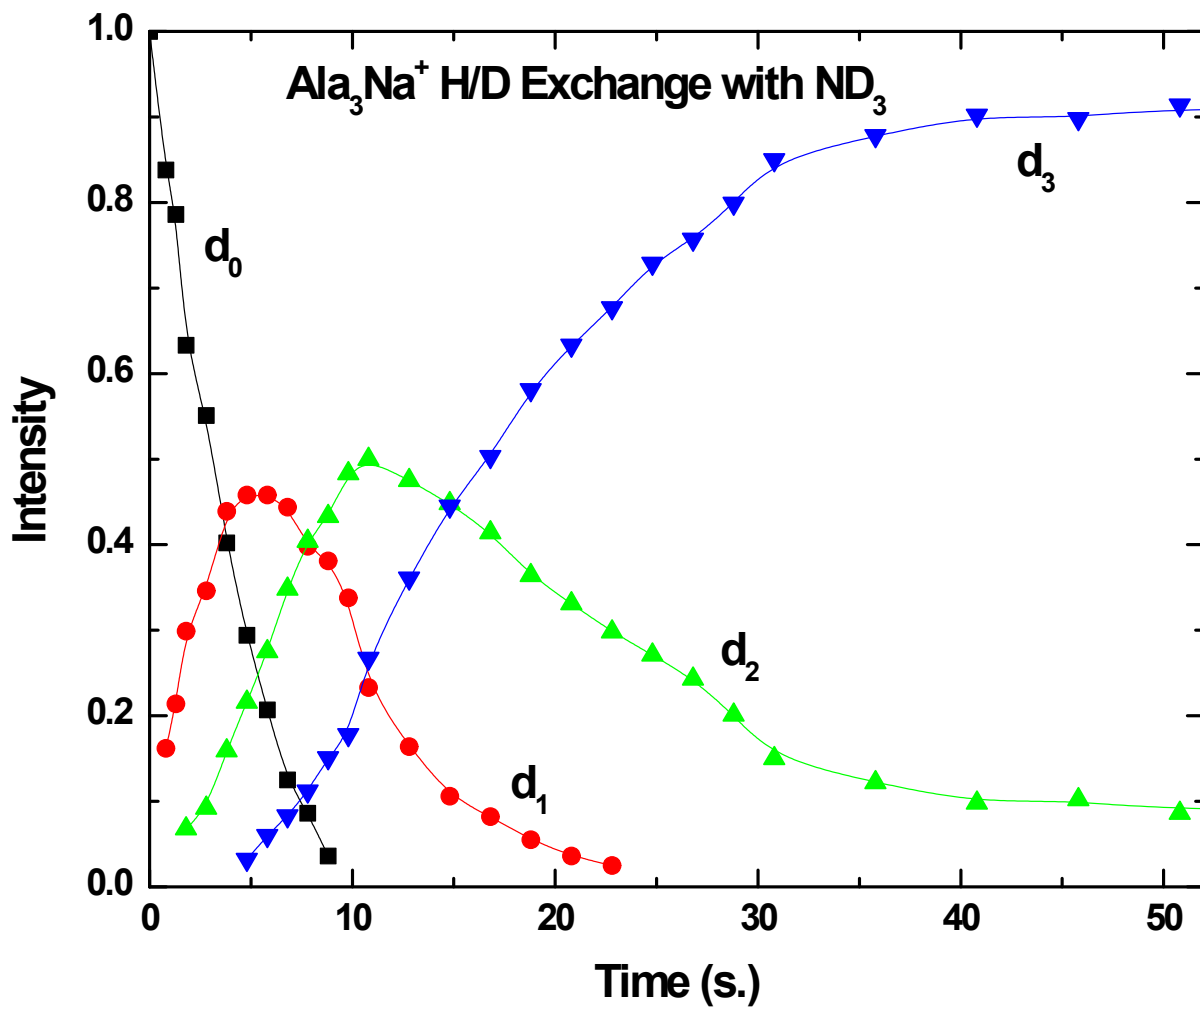

Figure S3

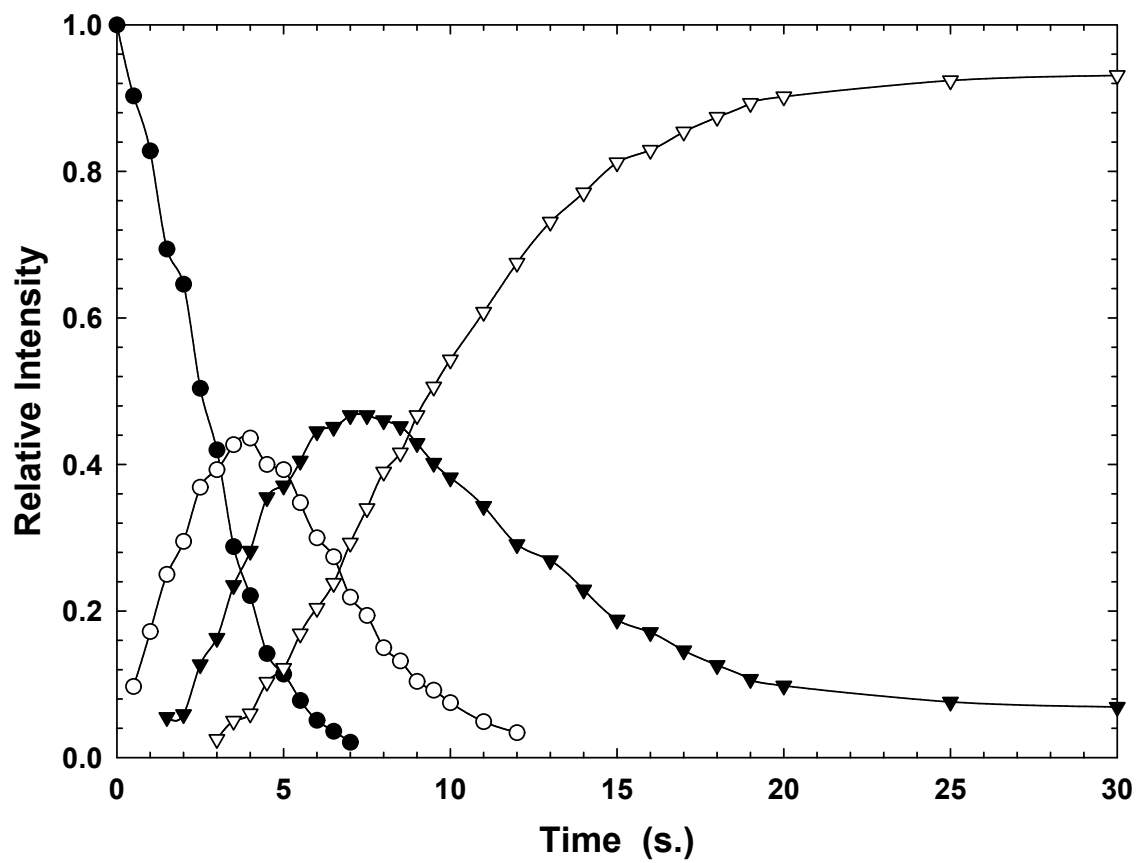

Figure S4

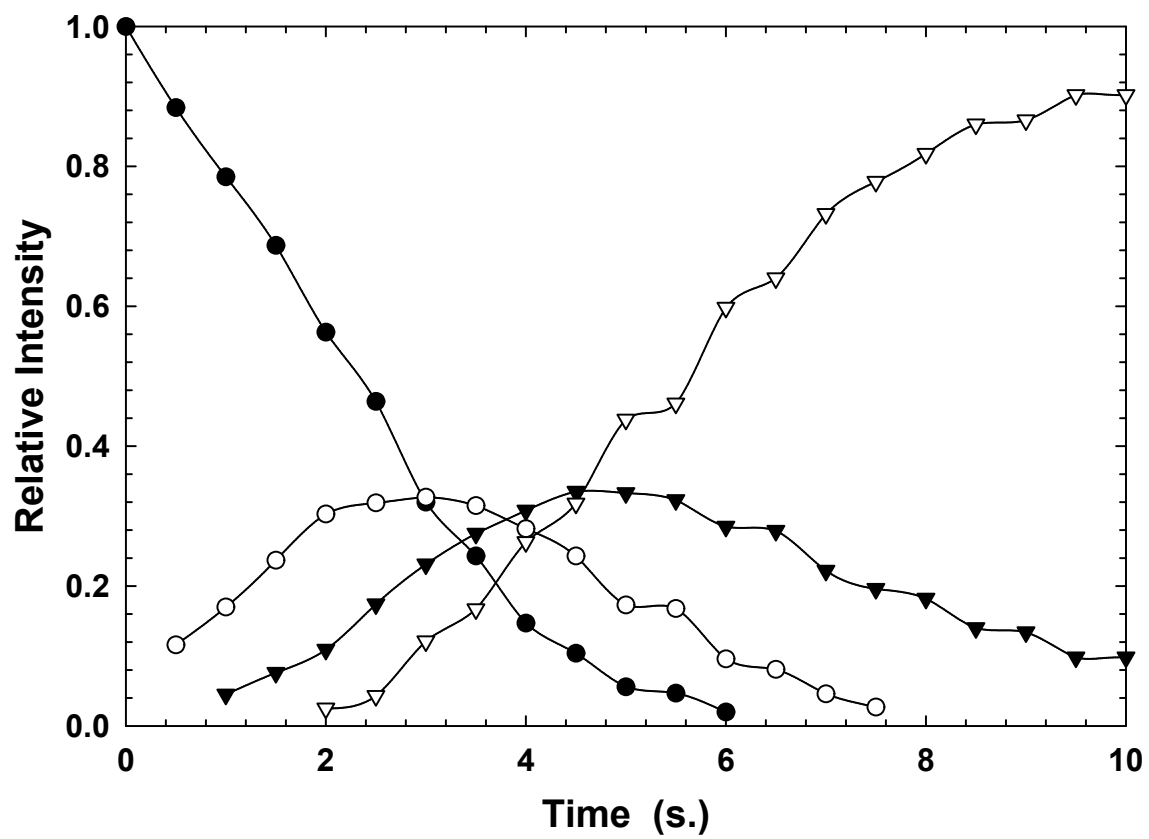

Figure S5

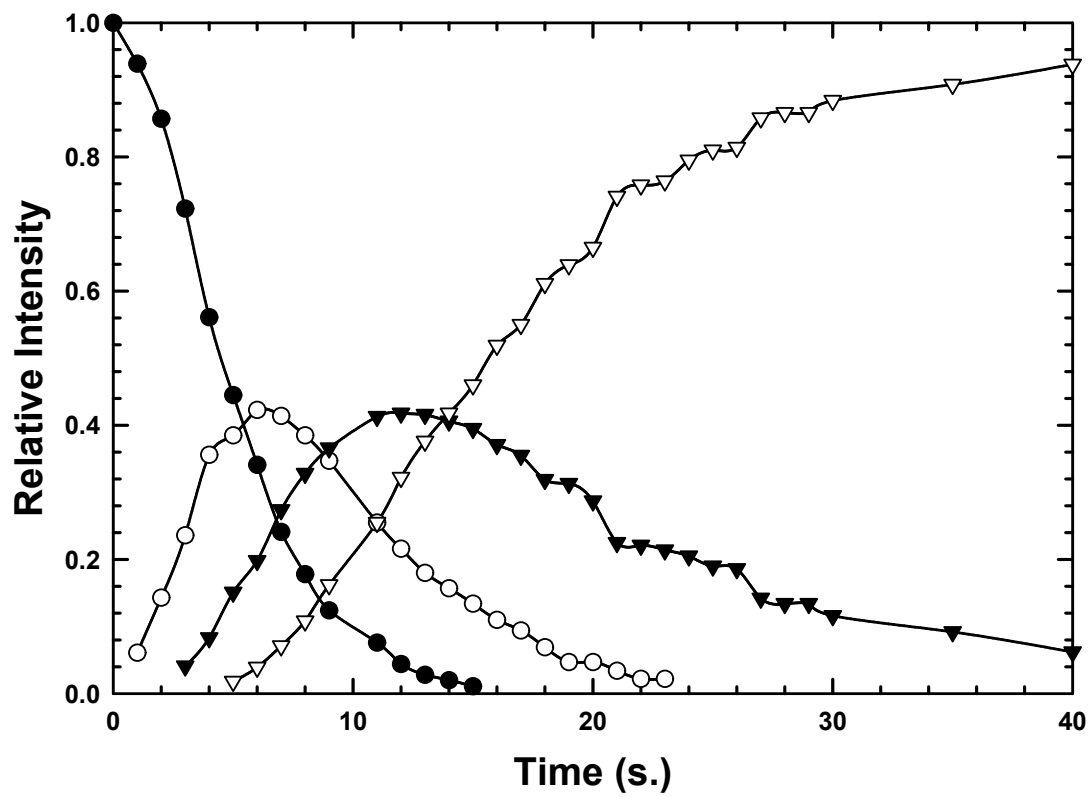

Figure S6
